# Supplementary material for: Development and Multi-Scale Validation of a Finite Element Football Helmet Model
Source: PubMed Central journal article supplement (PMC6928099; doi:10.1007/s10439-019-02345-7), 2019-09-13
Supplement: 10439_2019_2345_MOESM1_ESM.pdf [file 10439_2019_2345_MOESM1_ESM.pdf]

**Appendix: 2016 Schutt Air XP Pro v.1.0**

|                                       |    |
|---------------------------------------|----|
| Figures.....                          | 2  |
| Tables .....                          | 2  |
| Physical Measurement Comparison ..... | 4  |
| Material Testing Validation .....     | 5  |
| Component Testing Validation.....     | 11 |
| Validation Test Overview .....        | 13 |
| Correlation Analysis.....             | 19 |

## Figures

|                                                                                                                                                                                                                                                                                                                                                                                                                                                      |    |
|------------------------------------------------------------------------------------------------------------------------------------------------------------------------------------------------------------------------------------------------------------------------------------------------------------------------------------------------------------------------------------------------------------------------------------------------------|----|
| Figure A1. Material testing validation for the thermoplastic outer shell.....                                                                                                                                                                                                                                                                                                                                                                        | 5  |
| Figure A2. Visualizes the position of each type of foam tested relative to the helmet. ....                                                                                                                                                                                                                                                                                                                                                          | 6  |
| Figure A3. Material testing validation for the foam. ....                                                                                                                                                                                                                                                                                                                                                                                            | 8  |
| Figure A4. Material testing validation for the vinyl padding covering. ....                                                                                                                                                                                                                                                                                                                                                                          | 8  |
| Figure A5. Material testing validation for the conical absorbers. ....                                                                                                                                                                                                                                                                                                                                                                               | 9  |
| Figure A6. Shows varying degrees of conical absorber buckling between the single cone compression test and the full-helmet 4.9 m/s frontal Hybrid III drop test. A) Single cone compression test at max deflection B) Compression of the conical absorbers at the start of the simulation C) Compression of the conical absorbers at 10 ms. Note that parts of the helmet have been visually hidden to highlight the conical absorber response. .... | 9  |
| Figure A7. Material testing validation for the chinstrap. ....                                                                                                                                                                                                                                                                                                                                                                                       | 10 |
| Figure A8. Component level testing validation for the facemask. ....                                                                                                                                                                                                                                                                                                                                                                                 | 11 |
| Figure A9. Component level testing validation for the thermoplastic outer shell. The data begins after an initial preloading. ....                                                                                                                                                                                                                                                                                                                   | 11 |
| Figure A10. Component level testing validation for the meso-scale padding. High rate 10 m/s filtered 10,000 Hz SAE ms. ....                                                                                                                                                                                                                                                                                                                          | 12 |
| Figure A11. Fitting of helmet onto a HIII head form.....                                                                                                                                                                                                                                                                                                                                                                                             | 17 |
| Figure A12. Visual heat map of first principle stress experienced by A) Thermoplastic outer shell, B) Conical absorbers, C) Foam, D) Chinstrap in the 6.1 m/s front boss pendulum impact.....                                                                                                                                                                                                                                                        | 17 |
| Figure A13. Histogram showing the distribution of CORA scores for each boundary condition setup by number of simulations for each range of CORA scores. ....                                                                                                                                                                                                                                                                                         | 22 |

## Tables

|                                                                                                                    |    |
|--------------------------------------------------------------------------------------------------------------------|----|
| Table A1. Physical thickness of model components and a mass comparison between the model and physical helmet. .... | 4  |
| Table A2. Linear impactor (LI) validation tests. ....                                                              | 13 |
| Table A3. Drop tower (DI) validation tests with NOCSAE head form. ....                                             | 14 |
| Table A4. Drop tower (DI) validation tests with HIII head form. ....                                               | 15 |
| Table A5. Pendulum impact (PI) validation tests.....                                                               | 16 |

|                                                                                                                     |    |
|---------------------------------------------------------------------------------------------------------------------|----|
| Table A6. Breakdown of the various helmet components in terms of element type, size, and total element number. .... | 18 |
| Table A7. CORA scores for the pendulum impact (PI) with hybrid III head form.....                                   | 19 |
| Table A8. CORA scores for the linear impact (LI) with hybrid III head form.....                                     | 20 |
| Table A9. CORA scores for the drop impact (DI) with NOCSAE head form. ....                                          | 21 |
| Table A10. CORA scores for the drop impact (DI) with Hybrid III head form.....                                      | 21 |

## Physical Measurement Comparison

**Table A1. Physical thickness of model components and a mass comparison between the model and physical helmet.**

| <b>Component</b>       | <b>Thickness (mm)</b> | <b>Measured Mass (kg)</b> | <b>Model Mass (kg)</b> |
|------------------------|-----------------------|---------------------------|------------------------|
| Facemask               | 5.19 / 6.15           | 0.451                     | 0.452                  |
| Outer Shell            | 3.55                  | 0.673                     | 0.673                  |
| Conical Absorbers      | 1.09                  | 0.281                     | 0.292                  |
| Vinyl Foam<br>Covering | 0.50 / 0.60           | 0.203                     | 0.26                   |
| Foams                  | 7.5 – 11.9            |                           |                        |
| Chin Cup/Strap         | 2.00                  | 0.062                     | 0.035                  |
| <b>Total</b>           | ~                     | <b>1.670</b>              | <b>1.712</b>           |

## Material Testing Validation

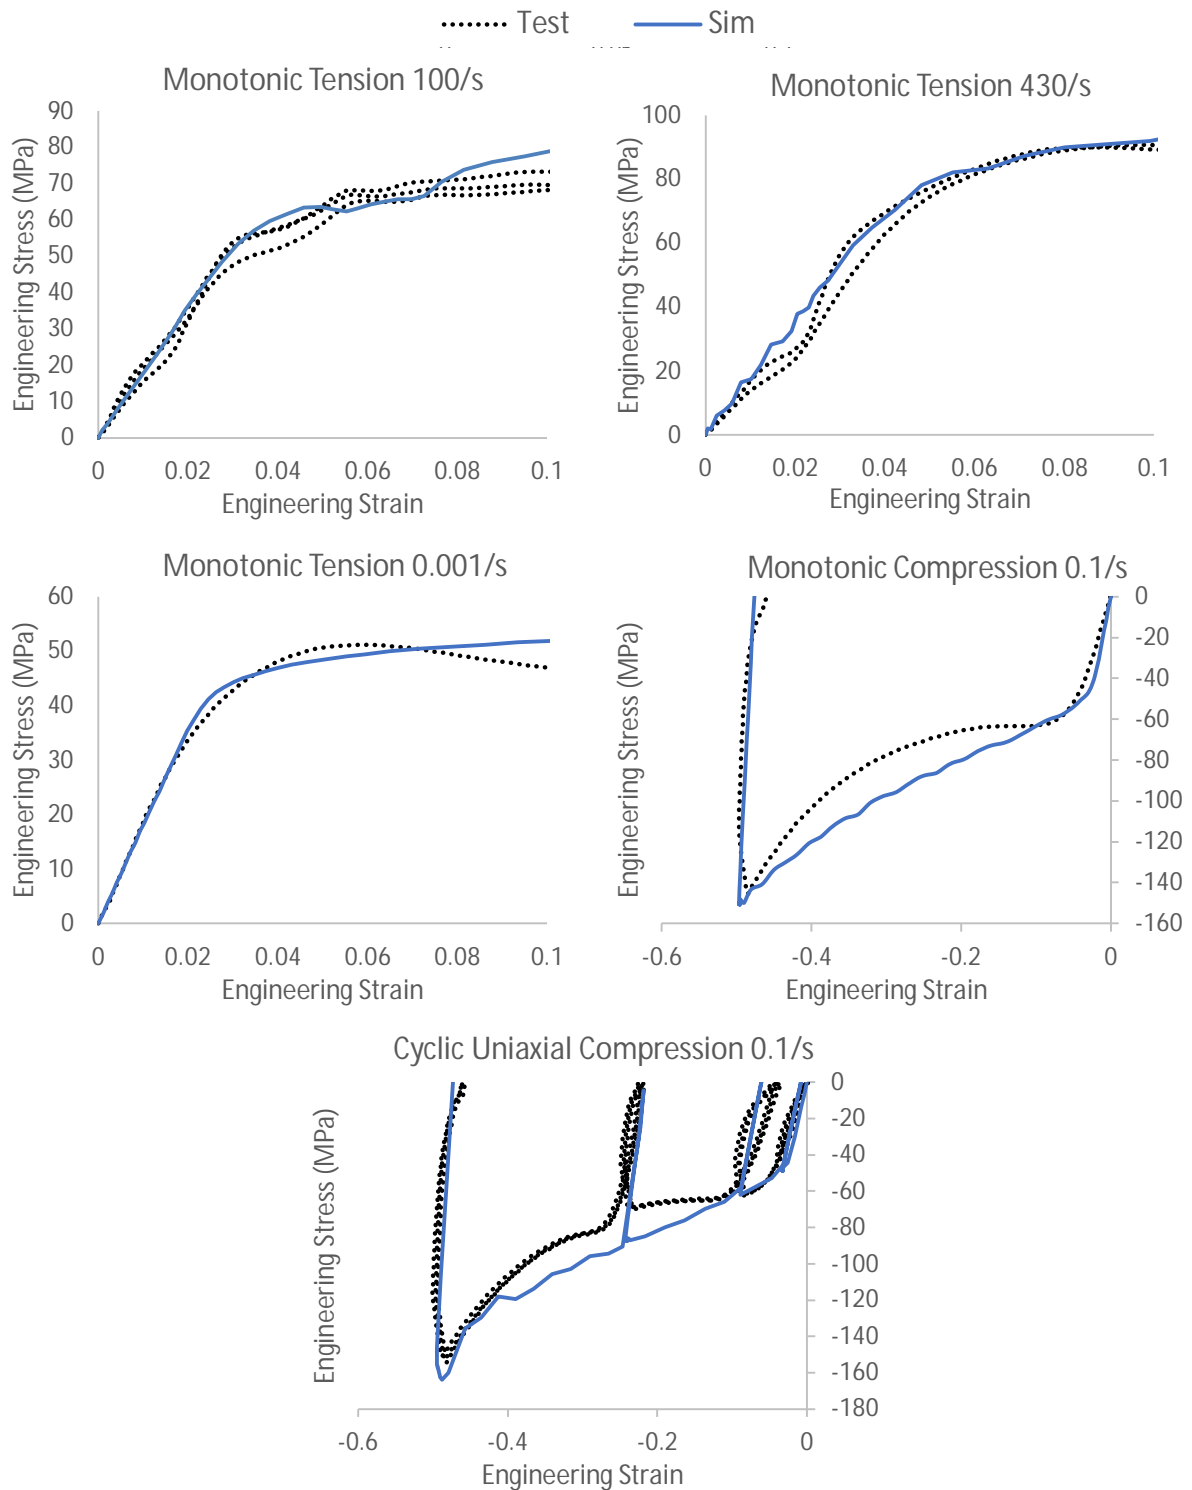

Figure A1. Material testing validation for the thermoplastic outer shell.

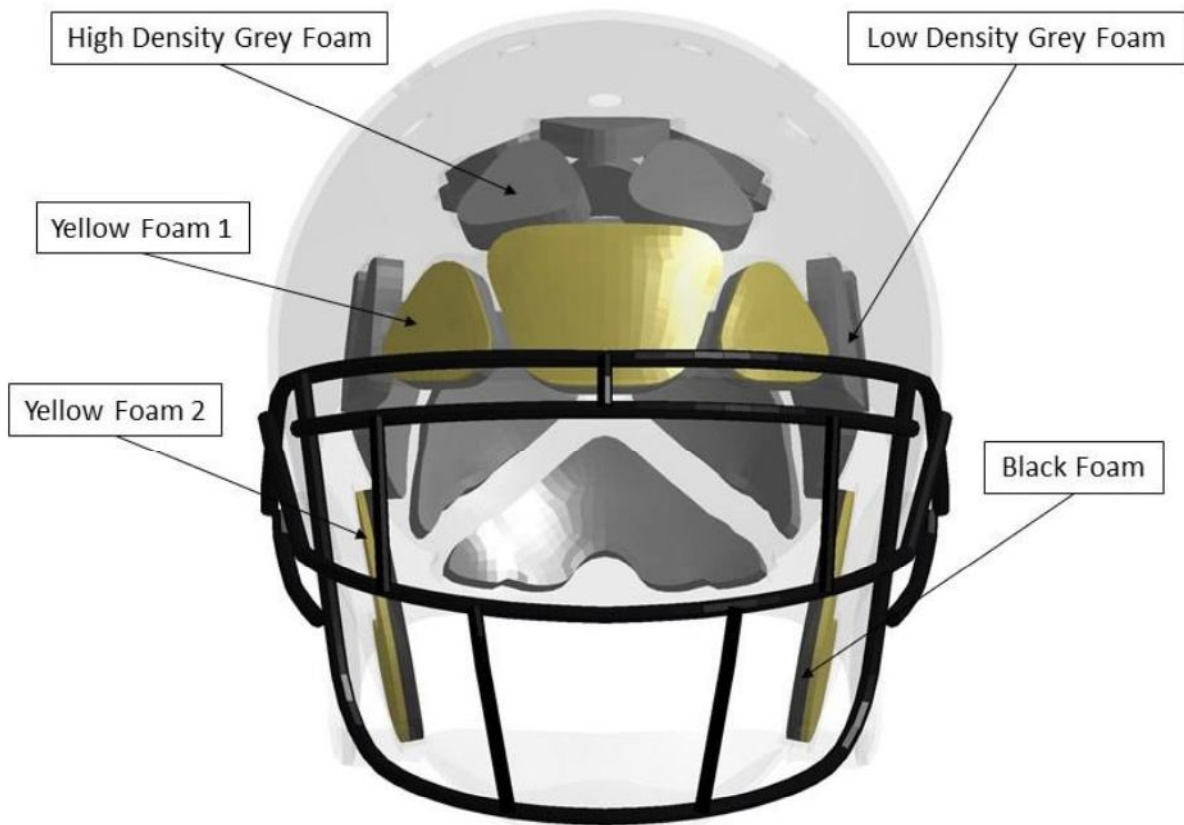

**Figure A2. Visualizes the position of each type of foam tested relative to the helmet.**

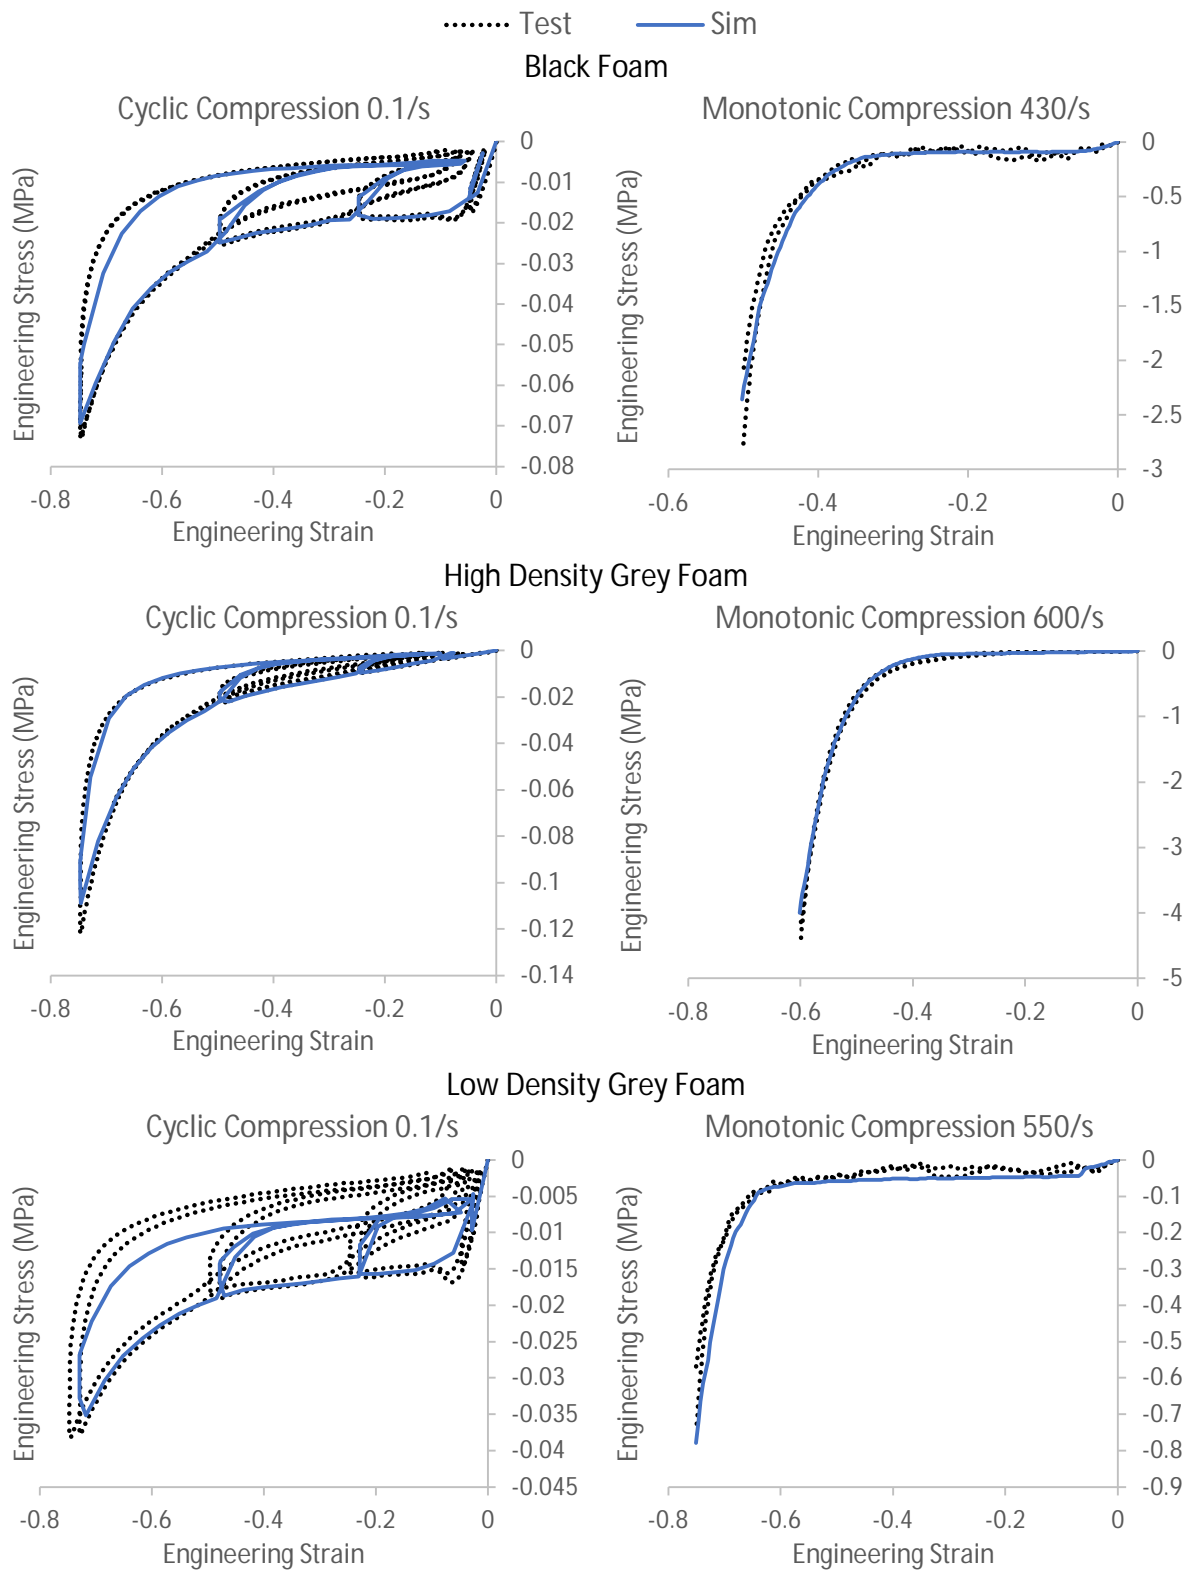

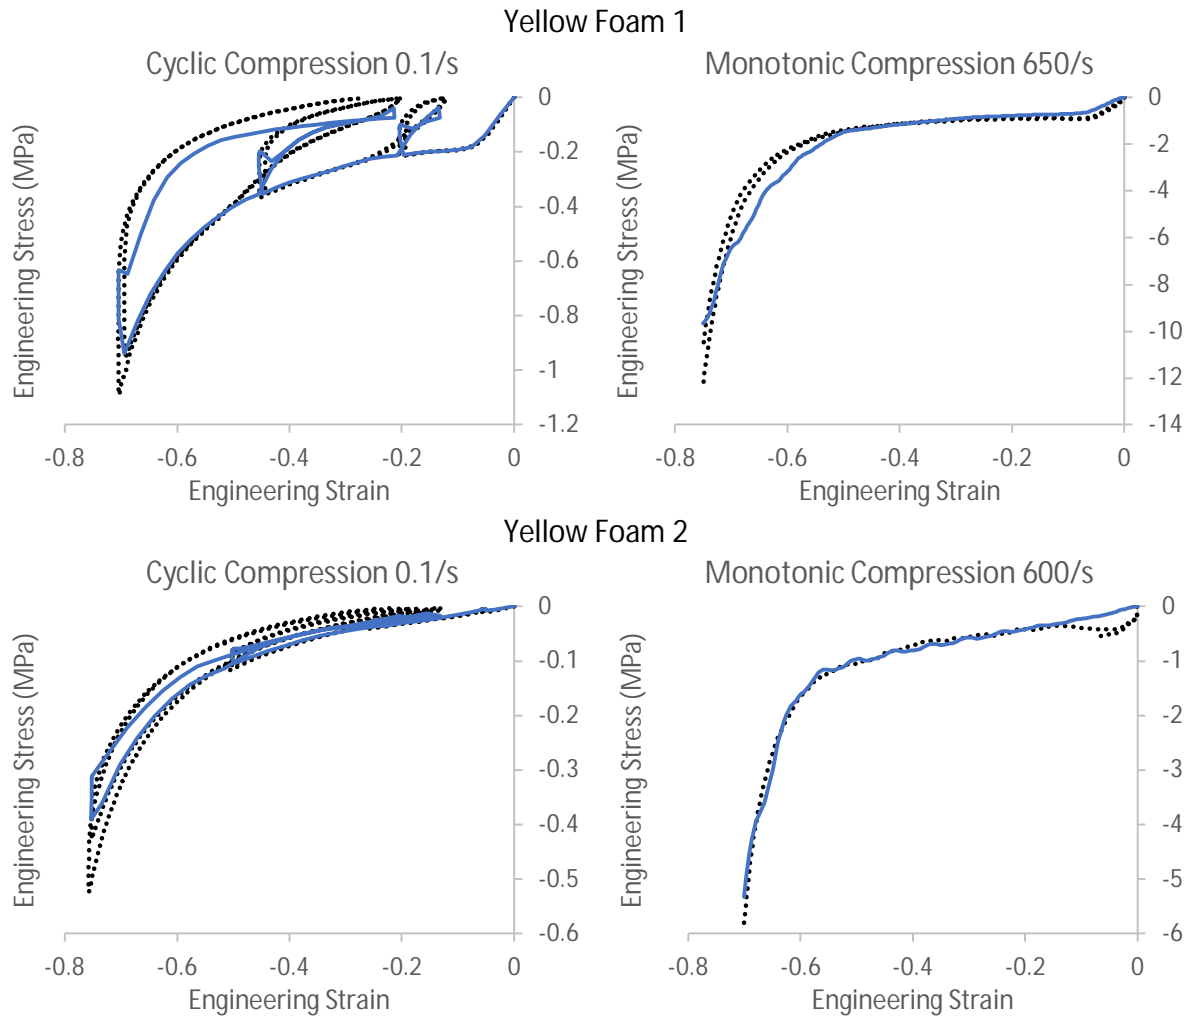

**Figure A3. Material testing validation for the foam.**

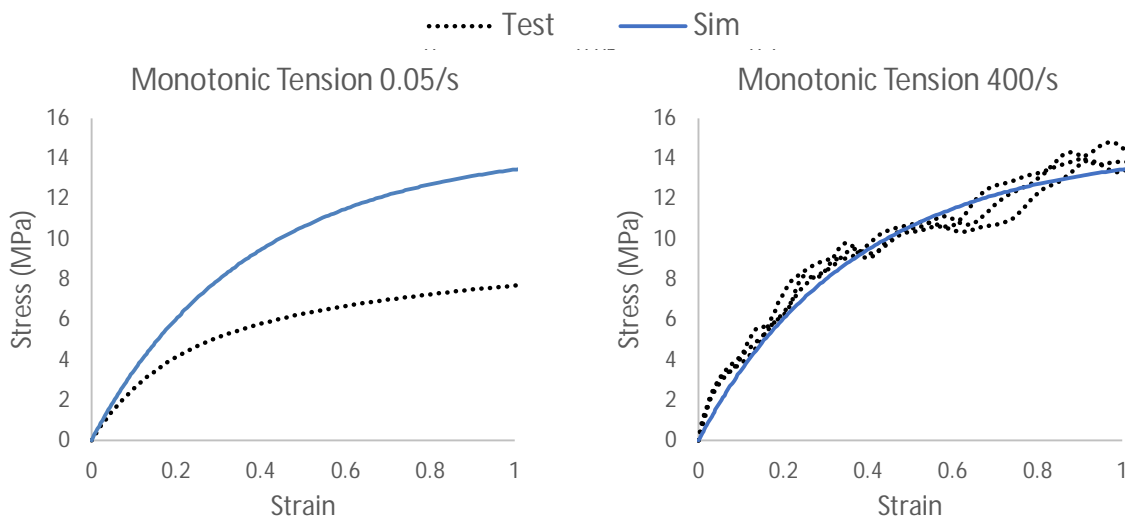

**Figure A4. Material testing validation for the vinyl padding covering.**



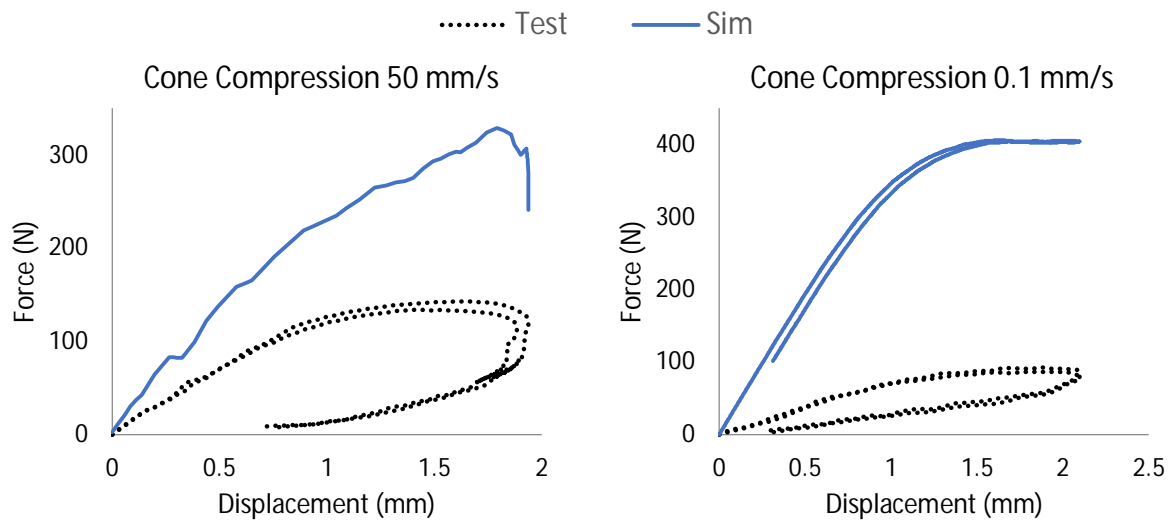

**Figure A5. Material testing validation for the conical absorbers.**

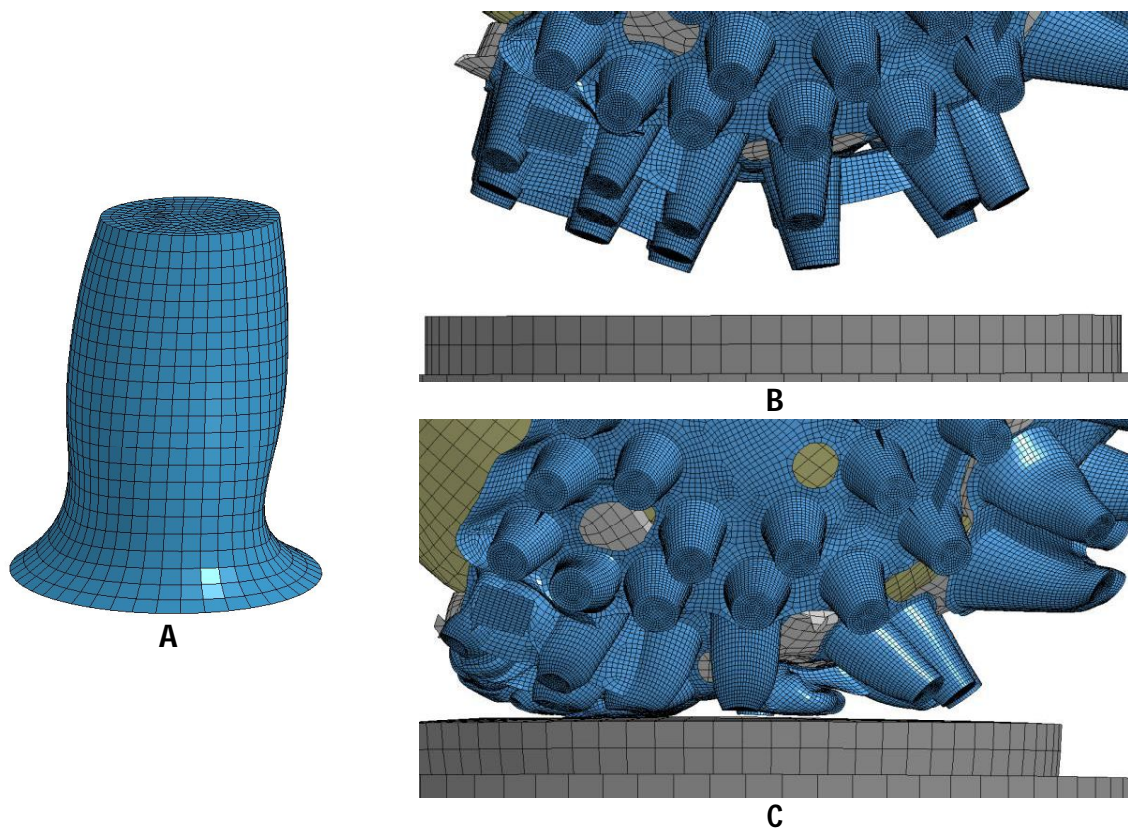

**Figure A6. Shows varying degrees of conical absorber buckling between the single cone compression test and the full-helmet 4.9 m/s frontal Hybrid III drop test. A) Single cone compression test at max deflection B) Compression of the conical absorbers at the start of the simulation C) Compression of the conical absorbers at 10 ms. Note that parts of the helmet have been visually hidden to highlight the conical absorber response.**

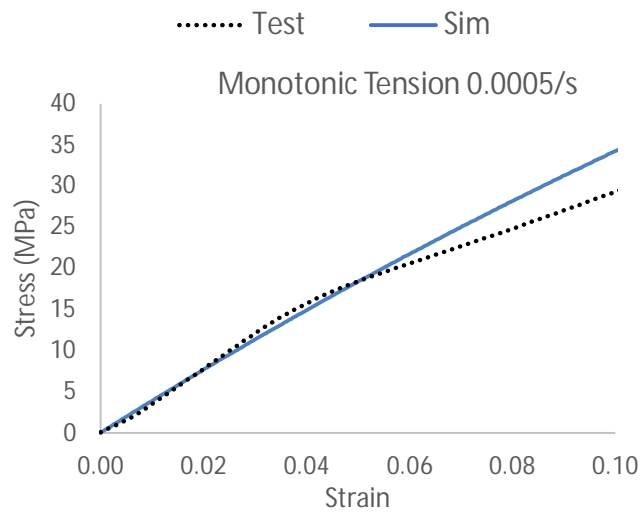

**Figure A7. Material testing validation for the chinstrap.**

## Component Testing Validation

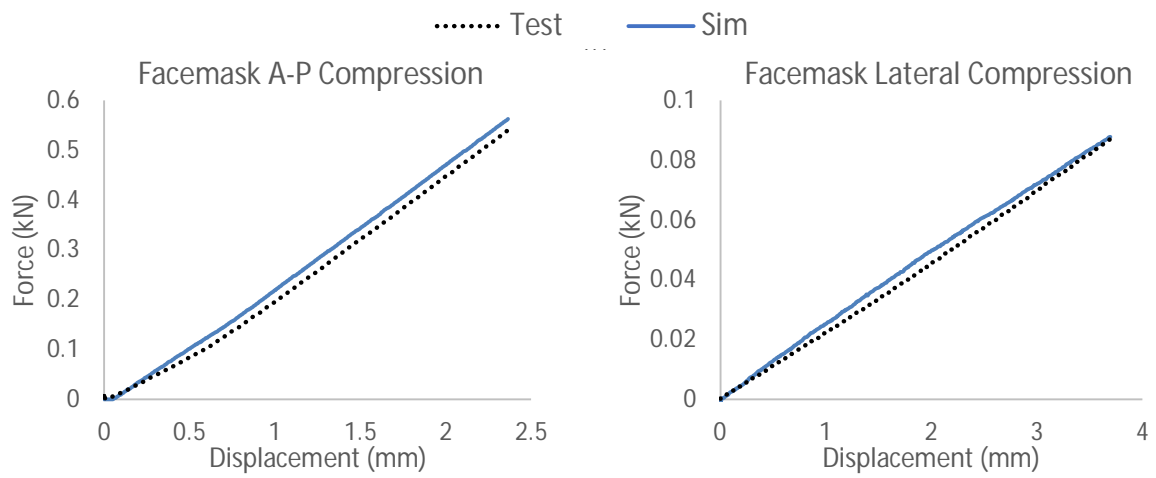

**Figure A8. Component level testing validation for the facemask.**

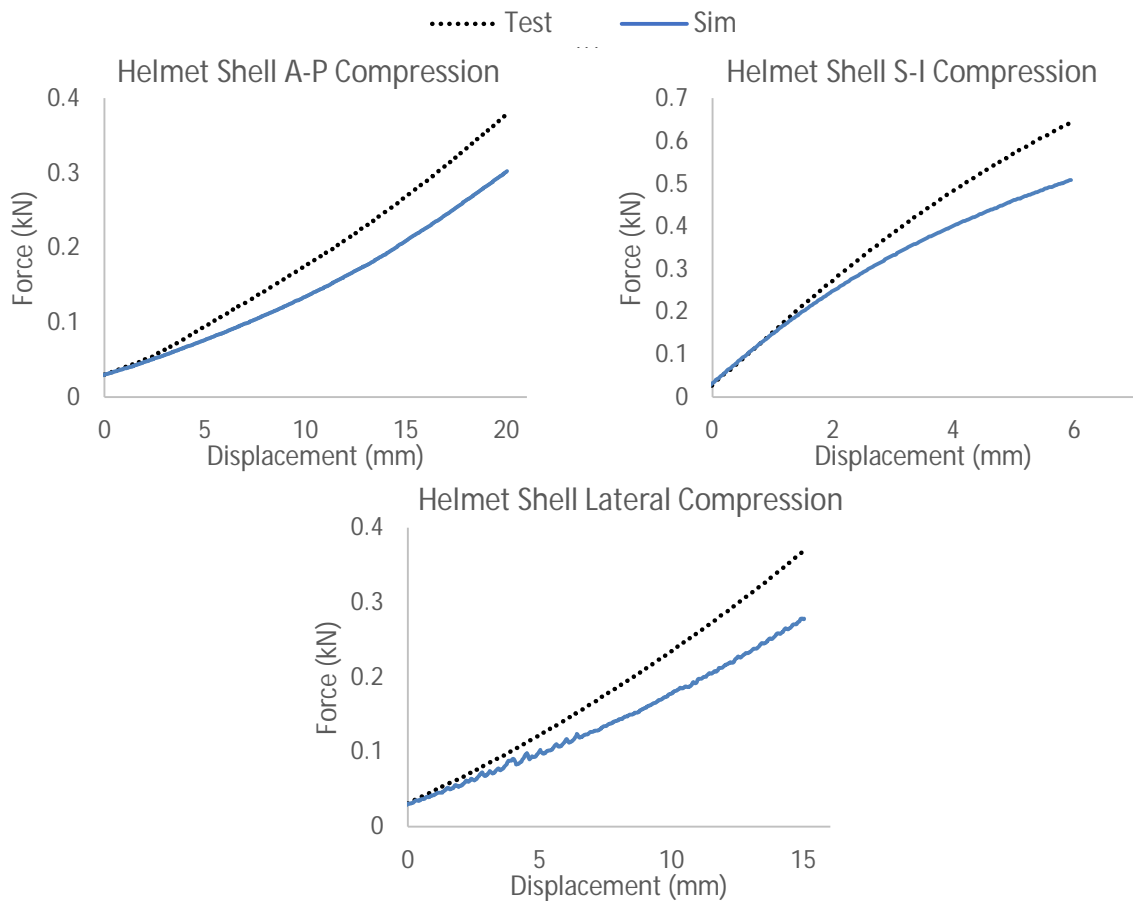

**Figure A9. Component level testing validation for the thermoplastic outer shell. The data begins after an initial preloading.**

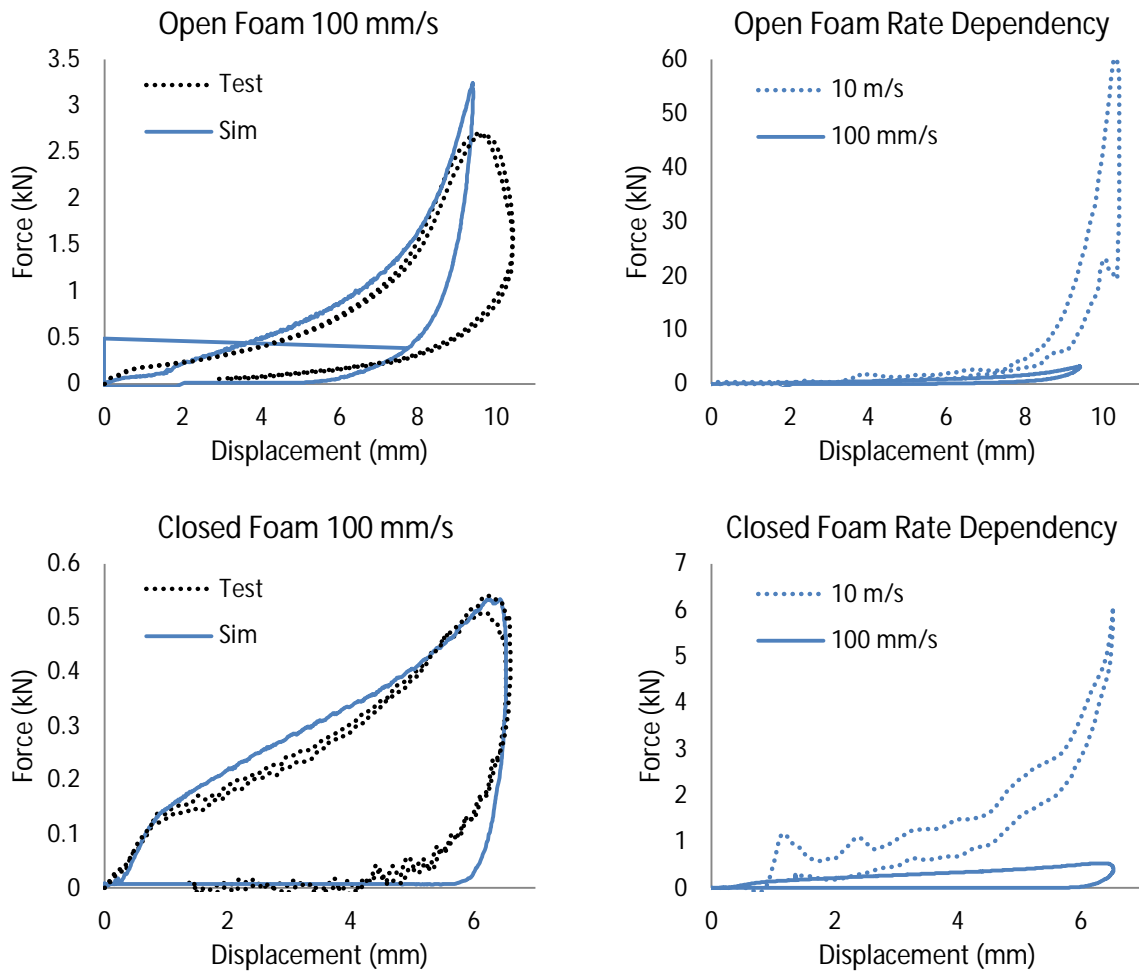

**Figure A10. Component level testing validation for the meso-scale padding. High rate 10 m/s filtered 10,000 Hz SAE ms.**

## Validation Test Overview

**Table A2. Linear impactor (LI) validation tests.**

| Impact Configuration |                       | Evaluation Criteria              |                                 |                             |                  | Simulation                                                                            | Experiment                                                                            |
|----------------------|-----------------------|----------------------------------|---------------------------------|-----------------------------|------------------|---------------------------------------------------------------------------------------|---------------------------------------------------------------------------------------|
|                      | Impact Velocity [m/s] | Force versus Time                | Linear Acceleration versus Time |                             | Angular Velocity |                                                                                       |                                                                                       |
| <b>A</b>             | 5.5                   | Contact Force (Impact direction) | Head CG (XYZ)                   | Impactor (Impact direction) | Head CG (XYZ)    |    |    |
|                      | 7.4                   |                                  |                                 |                             |                  |                                                                                       |                                                                                       |
|                      | 9.3                   |                                  |                                 |                             |                  |                                                                                       |                                                                                       |
| <b>AP</b>            | 5.5                   | Contact Force (Impact direction) | Head CG (XYZ)                   | Impactor (Impact direction) | Head CG (XYZ)    |    |    |
|                      | 7.4                   |                                  |                                 |                             |                  |                                                                                       |                                                                                       |
|                      | 9.3                   |                                  |                                 |                             |                  |                                                                                       |                                                                                       |
| <b>B</b>             | 5.5                   | Contact Force (Impact direction) | Head CG (XYZ)                   | Impactor (Impact direction) | Head CG (XYZ)    |   |   |
|                      | 7.4                   |                                  |                                 |                             |                  |                                                                                       |                                                                                       |
|                      | 9.3                   |                                  |                                 |                             |                  |                                                                                       |                                                                                       |
| <b>C</b>             | 5.5                   | Contact Force (Impact direction) | Head CG (XYZ)                   | Impactor (Impact direction) | Head CG (XYZ)    |  |  |
|                      | 7.4                   |                                  |                                 |                             |                  |                                                                                       |                                                                                       |
|                      | 9.3                   |                                  |                                 |                             |                  |                                                                                       |                                                                                       |
| <b>D</b>             | 5.5                   | Contact Force (Impact direction) | Head CG (XYZ)                   | Impactor (Impact direction) | Head CG (XYZ)    |  |  |
|                      | 7.4                   |                                  |                                 |                             |                  |                                                                                       |                                                                                       |
|                      | 9.3                   |                                  |                                 |                             |                  |                                                                                       |                                                                                       |
| <b>F</b>             | 5.5                   | Contact Force (Impact direction) | Head CG (XYZ)                   | Impactor (Impact direction) | Head CG (XYZ)    |  |  |
|                      | 7.4                   |                                  |                                 |                             |                  |                                                                                       |                                                                                       |
|                      | 9.3                   |                                  |                                 |                             |                  |                                                                                       |                                                                                       |
| <b>R</b>             | 5.5                   | Contact Force (Impact direction) | Head CG (XYZ)                   | Impactor (Impact direction) | Head CG (XYZ)    |  |  |
|                      | 7.4                   |                                  |                                 |                             |                  |                                                                                       |                                                                                       |
|                      | 9.3                   |                                  |                                 |                             |                  |                                                                                       |                                                                                       |
| <b>UT</b>            | 5.5                   | Contact Force (Impact direction) | Head CG (XYZ)                   | Impactor (Impact direction) | Head CG (XYZ)    |  |  |
|                      | 7.4                   |                                  |                                 |                             |                  |                                                                                       |                                                                                       |
|                      | 9.3                   |                                  |                                 |                             |                  |                                                                                       |                                                                                       |

**Table A3. Drop tower (DI) validation tests with NOCSAE head form.**

| Impact Configuration |                  | Evaluation Criteria |                                 |                 | Simulation                                                                           | Experiment                                                                            |
|----------------------|------------------|---------------------|---------------------------------|-----------------|--------------------------------------------------------------------------------------|---------------------------------------------------------------------------------------|
|                      | Drop Height [ft] | Force versus Time   | Linear Acceleration versus Time |                 |                                                                                      |                                                                                       |
| <b>Back*</b>         | 1.6              | Contact Force (XZ)  | Head CG (X)                     | Carriage Acc. Z |    |    |
|                      | 2.6              |                     |                                 |                 |                                                                                      |                                                                                       |
|                      | 4.6              |                     |                                 |                 |                                                                                      |                                                                                       |
|                      | 7.0              |                     |                                 |                 |                                                                                      |                                                                                       |
| <b>Front</b>         | 1.6              | Contact Force (XZ)  | Head CG (XZ)                    | Carriage Acc. Z |    |    |
|                      | 2.6              |                     |                                 |                 |                                                                                      |                                                                                       |
|                      | 4.6              |                     |                                 |                 |                                                                                      |                                                                                       |
|                      | 7.0              |                     |                                 |                 |                                                                                      |                                                                                       |
| <b>Mask*</b>         | 1.6              | Contact Force (XZ)  | Head CG (X)                     | Carriage Acc. Z |   |   |
|                      | 2.6              |                     |                                 |                 |                                                                                      |                                                                                       |
|                      | 4.6              |                     |                                 |                 |                                                                                      |                                                                                       |
| <b>Side</b>          | 1.6              | Contact Force (XZ)  | Head CG (YZ)                    | Carriage Acc. Z |  |  |
|                      | 2.6              |                     |                                 |                 |                                                                                      |                                                                                       |
|                      | 4.6              |                     |                                 |                 |                                                                                      |                                                                                       |
|                      | 7.0              |                     |                                 |                 |                                                                                      |                                                                                       |
| <b>Top</b>           | 1.6              | Contact Force (XZ)  | Head CG (XZ)                    | Carriage Acc. Z |  |  |
|                      | 2.6              |                     |                                 |                 |                                                                                      |                                                                                       |
|                      | 4.6              |                     |                                 |                 |                                                                                      |                                                                                       |
|                      | 7.0              |                     |                                 |                 |                                                                                      |                                                                                       |

**Table A4. Drop tower (DI) validation tests with HIII head form.**

| Impact Configuration |                  | Evaluation Criteria |                                 |                 | Simulation                                                                           | Experiment                                                                            |
|----------------------|------------------|---------------------|---------------------------------|-----------------|--------------------------------------------------------------------------------------|---------------------------------------------------------------------------------------|
|                      | Drop Height [ft] | Force versus Time   | Linear Acceleration versus Time |                 |                                                                                      |                                                                                       |
| <b>Back</b>          | 1.6              | Contact Force (XZ)  | Head CG (XYZ)                   | Carriage Acc. Z | 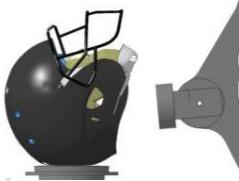   |    |
|                      | 4.6              |                     |                                 |                 |                                                                                      |                                                                                       |
|                      | 7.0              |                     |                                 |                 |                                                                                      |                                                                                       |
| <b>Front</b>         | 1.6              | Contact Force (XZ)  | Head CG (XYZ)                   | Carriage Acc. Z |    |    |
|                      | 4.6              |                     |                                 |                 |                                                                                      |                                                                                       |
|                      | 7.0              |                     |                                 |                 |                                                                                      |                                                                                       |
| <b>Side</b>          | 1.6              | Contact Force (XZ)  | Head CG (XYZ)                   | Carriage Acc. Z |   |   |
|                      | 4.6              |                     |                                 |                 |                                                                                      |                                                                                       |
|                      | 7.0              |                     |                                 |                 |                                                                                      |                                                                                       |
| <b>Top</b>           | 1.6              | Contact Force (XZ)  | Head CG (XYZ)                   | Carriage Acc. Z |  |  |
|                      | 4.6              |                     |                                 |                 |                                                                                      |                                                                                       |
|                      | 7.0              |                     |                                 |                 |                                                                                      |                                                                                       |

**Table A5. Pendulum impact (PI) validation tests.**

| Impact Configuration |                       | Evaluation Criteria              |                                 |                             |                  | Simulation                                                                            |
|----------------------|-----------------------|----------------------------------|---------------------------------|-----------------------------|------------------|---------------------------------------------------------------------------------------|
|                      | Impact Velocity [m/s] | Force versus Time                | Linear Acceleration versus Time |                             | Angular Velocity |                                                                                       |
| Front                | 3.0                   | Contact Force (Impact direction) | Head CG (XYZ)                   | Impactor (Impact direction) | Head CG (XYZ)    |    |
|                      | 4.6                   |                                  |                                 |                             |                  |                                                                                       |
|                      | 6.1                   |                                  |                                 |                             |                  |                                                                                       |
| Front Boss           | 3.0                   | Contact Force (Impact direction) | Head CG (XYZ)                   | Impactor (Impact direction) | Head CG (XYZ)    |    |
|                      | 4.6                   |                                  |                                 |                             |                  |                                                                                       |
|                      | 6.1                   |                                  |                                 |                             |                  |                                                                                       |
| Side                 | 3.0                   | Contact Force (Impact direction) | Head CG (XYZ)                   | Impactor (Impact direction) | Head CG (XYZ)    |   |
|                      | 4.6                   |                                  |                                 |                             |                  |                                                                                       |
|                      | 6.1                   |                                  |                                 |                             |                  |                                                                                       |
| Back                 | 3.0                   | Contact Force (Impact direction) | Head CG (XYZ)                   | Impactor (Impact direction) | Head CG (XYZ)    |  |
|                      | 4.6                   |                                  |                                 |                             |                  |                                                                                       |
|                      | 6.1                   |                                  |                                 |                             |                  |                                                                                       |



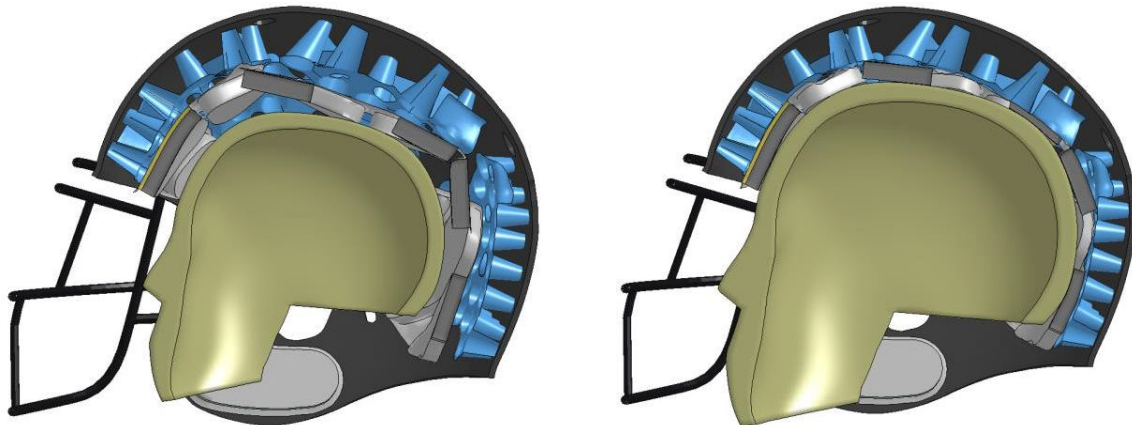

Figure A11. Fitting of helmet onto a HIII head form.

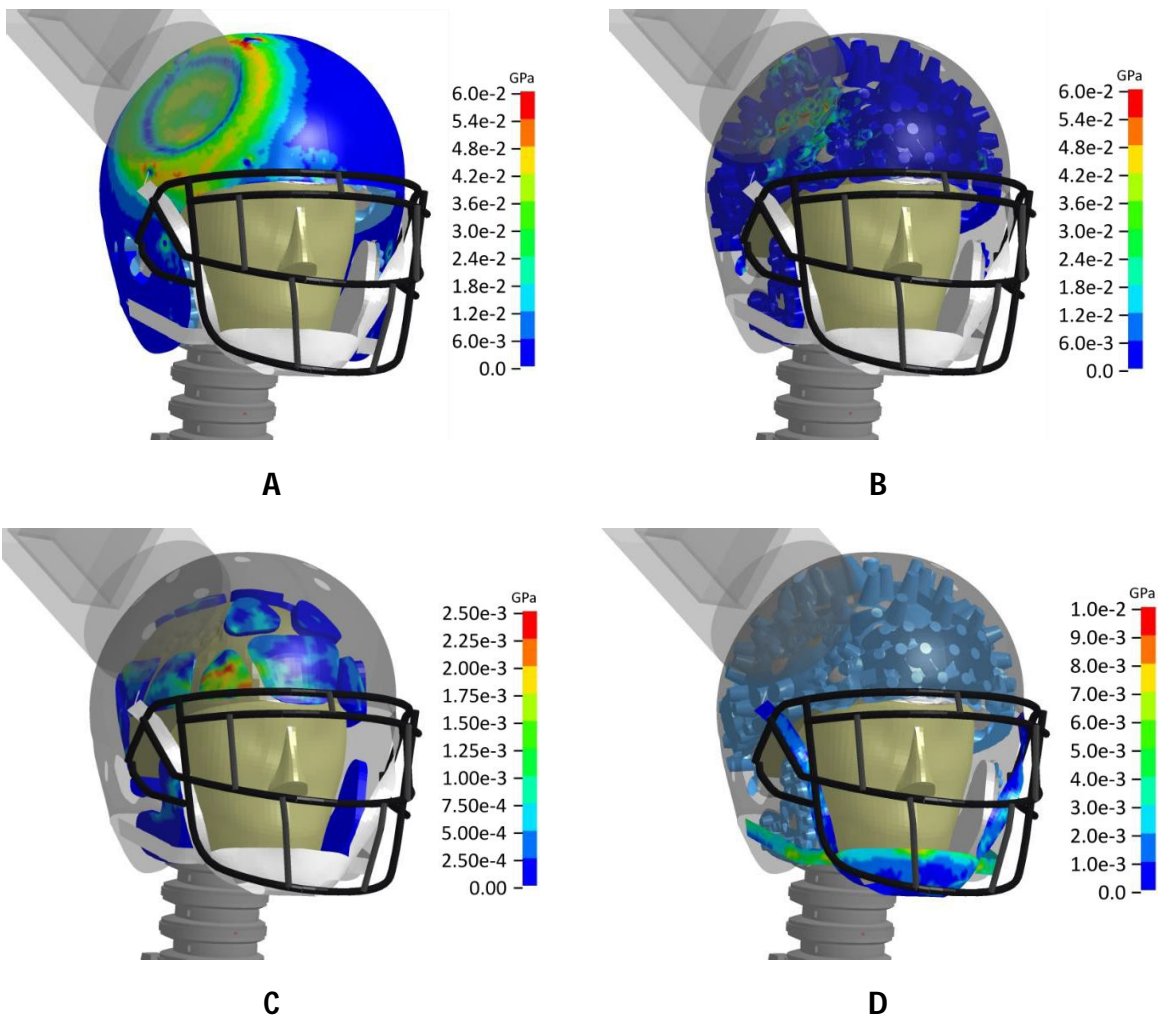

Figure A12. Visual heat map of first principle stress experienced by A) Thermoplastic outer shell, B) Conical absorbers, C) Foam, D) Chinstrap in the 6.1 m/s front boss pendulum impact.

**Table A6. Breakdown of the various helmet components in terms of element type, size, and total element number.**

| <b>Component</b>   | <b>Element Type</b> | <b>Element Edge Length (Approx.)</b> | <b># Elements</b> |
|--------------------|---------------------|--------------------------------------|-------------------|
| Facemask           | 1D Beam             | 10 mm                                | 202               |
| Helmet Shell       | 2D Quad             | 3 mm                                 | 22,418            |
| Conical Absorbers  | 2D Quad             | 1 mm                                 | 225,673           |
| Vinyl Covering     | 2D Quad             | 3.5 mm                               | 12,926            |
| Foams              | 3D Hexahedral       | 3 – 3.5 mm                           | 13,284            |
| Chin Cup           | 2D Quad             | 3 mm                                 | 780               |
| Chin Strap         | 2D Quad / 1D Beam   | 3.1 mm / single beam                 | 870 / 4           |
| <b>Full Helmet</b> |                     |                                      | <b>276,157</b>    |

\*Vinyl covering shares coincident nodes with underlying foam.

## Correlation Analysis

**Table A7. CORA scores for the pendulum impact (PI) with hybrid III head form.**

| Pendulum Impact (PI) |                |       |         |              |
|----------------------|----------------|-------|---------|--------------|
| CORA                 | Carriage_Accel | Accel | Ang_Vel | Total        |
| Front_1              | 0.821          | 0.756 | 0.543   | 0.706        |
| Front_2              | 0.629          | 0.695 | 0.647   | 0.657        |
| Front_3              | 0.535          | 0.649 | 0.646   | 0.610        |
| Front_Boss_1         | 0.758          | 0.582 | 0.720   | 0.687        |
| Front_Boss_2         | 0.778          | 0.645 | 0.833   | 0.752        |
| Front_Boss_3         | 0.662          | 0.603 | 0.753   | 0.672        |
| Back_1               | 0.804          | 0.822 | 0.836   | 0.820        |
| Back_2               | 0.946          | 0.894 | 0.868   | 0.902        |
| Back_3               | 0.860          | 0.780 | 0.894   | 0.845        |
| Side_1               | 0.839          | 0.815 | 0.865   | 0.840        |
| Side_2               | 0.922          | 0.893 | 0.906   | 0.907        |
| Side_3               | 0.926          | 0.871 | 0.904   | 0.900        |
|                      |                |       |         | <b>0.775</b> |

**Table A8. CORA scores for the linear impact (LI) with hybrid III head form.**

| Linear Impact (LI) |                |                |              |       |              |
|--------------------|----------------|----------------|--------------|-------|--------------|
| CORA               | Carriage_Accel | Head_Lin_Accel | Head_Ang_Vel | Force | Total        |
| AP_5               | 0.862          | 0.741          | 0.707        | 0.726 | 0.759        |
| AP_7               | 0.757          | 0.721          | 0.832        | 0.755 | 0.766        |
| AP_9               | 0.882          | 0.793          | 0.832        | 0.852 | 0.840        |
| A_5                | 0.864          | 0.805          | 0.676        | 0.792 | 0.784        |
| A_7                | 0.917          | 0.761          | 0.720        | 0.816 | 0.804        |
| A_9                | 0.567          | 0.775          | 0.689        | 0.777 | 0.702        |
| B_5                | 0.930          | 0.866          | 0.821        | 0.719 | 0.834        |
| B_7                | 0.917          | 0.865          | 0.874        | 0.741 | 0.850        |
| B_9                | 0.933          | 0.862          | 0.881        | 0.787 | 0.866        |
| C_5                | 0.871          | 0.835          | 0.740        | 0.866 | 0.828        |
| C_7                | 0.869          | 0.818          | 0.738        | 0.822 | 0.812        |
| C_9                | 0.872          | 0.812          | 0.724        | 0.825 | 0.808        |
| D_5                | 0.825          | 0.779          | 0.896        | 0.665 | 0.791        |
| D_7                | 0.831          | 0.784          | 0.905        | 0.655 | 0.794        |
| D_9                | 0.728          | 0.789          | 0.875        | 0.663 | 0.764        |
| F_5                | 0.645          | 0.673          | 0.641        | 0.728 | 0.672        |
| F_7                | 0.838          | 0.671          | 0.668        | 0.783 | 0.740        |
| F_9                | 0.649          | 0.796          | 0.724        | 0.676 | 0.711        |
| R_5                | 0.865          | 0.804          | 0.687        | 0.772 | 0.782        |
| R_7                | 0.861          | 0.791          | 0.738        | 0.780 | 0.793        |
| R_9                | 0.825          | 0.813          | 0.790        | 0.812 | 0.810        |
| UT_5               | 0.750          | 0.752          | 0.821        | 0.679 | 0.750        |
| UT_7               | 0.766          | 0.769          | 0.760        | 0.660 | 0.739        |
| UT_9               | 0.588          | 0.768          | 0.769        | 0.694 | 0.705        |
|                    |                |                |              |       | <b>0.779</b> |

**Table A9. CORA scores for the drop impact (DI) with NOCSAE head form.**

| Drop Impact NOCSAE (DI) |                |       |       |              |
|-------------------------|----------------|-------|-------|--------------|
| CORA                    | Carriage_Accel | Accel | Force | Total        |
| Front_1                 | 0.980          | 0.820 | 0.838 | 0.879        |
| Front_2                 | 0.899          | 0.829 | 0.789 | 0.839        |
| Front_3                 | 0.854          | 0.850 | 0.798 | 0.834        |
| Front_4                 | 0.882          | 0.805 | 0.827 | 0.838        |
| Top_1                   | 0.753          | 0.531 | 0.712 | 0.665        |
| Top_2                   | 0.689          | 0.626 | 0.508 | 0.608        |
| Top_3                   | 0.816          | 0.633 | 0.711 | 0.720        |
| Top_4                   | 0.872          | 0.618 | 0.789 | 0.759        |
| Side_1                  | 0.889          | 0.567 | 0.810 | 0.755        |
| Side_2                  | 0.956          | 0.719 | 0.871 | 0.848        |
| Side_3                  | 0.973          | 0.702 | 0.906 | 0.860        |
| Side_4                  | 0.954          | 0.625 | 0.864 | 0.814        |
|                         |                |       |       | <b>0.785</b> |

**Table A10. CORA scores for the drop impact (DI) with Hybrid III head form.**

| Drop Impact Hybrid III (DI) |                |       |       |              |
|-----------------------------|----------------|-------|-------|--------------|
| CORA                        | Carriage_Accel | Accel | Force | Total        |
| Front_1                     | 0.851          | 0.808 | 0.805 | 0.821        |
| Front_3                     | 0.897          | 0.837 | 0.911 | 0.882        |
| Front_4                     | 0.911          | 0.774 | 0.885 | 0.857        |
| Back_1                      | 0.808          | 0.578 | 0.689 | 0.692        |
| Back_3                      | 0.752          | 0.648 | 0.680 | 0.693        |
| Back_4                      | 0.691          | 0.669 | 0.728 | 0.696        |
| Top_1                       | 0.665          | 0.539 | 0.551 | 0.585        |
| Top_3                       | 0.790          | 0.600 | 0.597 | 0.662        |
| Top_4                       | 0.697          | 0.573 | 0.654 | 0.641        |
| Side_1                      | 0.682          | 0.588 | 0.614 | 0.628        |
| Side_3                      | 0.798          | 0.576 | 0.725 | 0.699        |
| Side_4                      | 0.726          | 0.534 | 0.704 | 0.654        |
|                             |                |       |       | <b>0.709</b> |

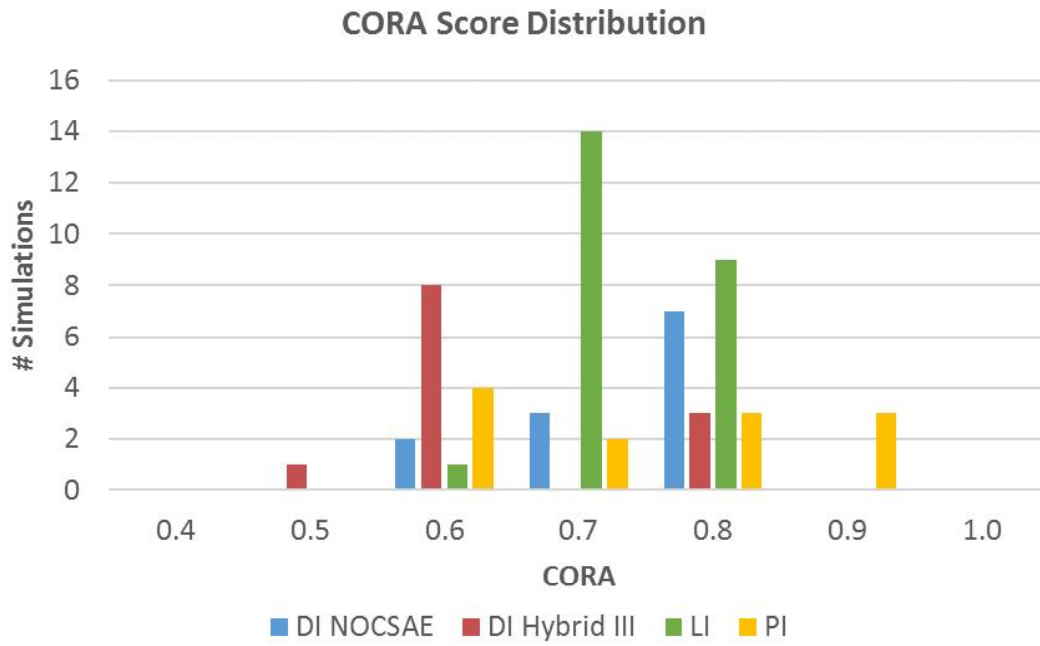

**Figure A13.** Histogram showing the distribution of CORA scores for each boundary condition setup by number of simulations for each range of CORA scores.
